# Supplementary material for: Mirikizumab Pharmacokinetics in Patients with Moderately to Severely Active Ulcerative Colitis: Results from Phase III LUCENT Studies
Source: Springer Nature journal article supplement (doi:10.1007/s40262-023-01281-z), 2023-08-23
Supplement: MOESM1 [file 25953310]

## **Supplementary Information**

### **Mirikizumab Pharmacokinetics in Patients With Moderately-to-Severely Active Ulcerative Colitis: Results From Phase III LUCENT Studies**

Laiyi Chua<sup>1</sup>, Stuart Friedrich<sup>2</sup>, Xin Cindy Zhang<sup>2</sup>

#### **AUTHORS' AFFILIATIONS**

<sup>1</sup> Eli Lilly Singapore, Singapore

<sup>2</sup> Eli Lilly and Company, Indianapolis, IN, USA

#### **CORRESPONDING AUTHOR**

Xin Cindy Zhang

Global PK/PD and Pharmacometrics

Eli Lilly and Company

893 Delaware Street

Indianapolis, IN 46225

USA

Tel: +1-317-276-3757

Email: zhang\_xin\_xz@lilly.com

Journal name: Clinical Pharmacokinetics

## LIST OF TABLES AND FIGURES

**Online Resource 1: Fig. 1** Design of AMAC, LUCENT 1, and LUCENT 2 trials

**Online Resource 2: Table 1** PK sampling schedule for AMAC, LUCENT 1, and LUCENT 2

**Online Resource 3: Fig. 2** General process for PK modeling. *PK* pharmacokinetic

**Online Resource 4: Table 2** List of covariates tested with the model generated using the AMAC and LUCENT 1+2 results for their impact on mirikizumab PK

**Online Resource 2: Table 1** PK sampling schedule for AMAC, LUCENT 1, and LUCENT 2

| AMAC primary study |                   |                 | AMAC extension study |                   |                 | LUCENT 1       |                  |                |                |
|--------------------|-------------------|-----------------|----------------------|-------------------|-----------------|----------------|------------------|----------------|----------------|
| W                  | V                 | S               | W                    | V                 | S               | W              | V                | S              |                |
| Screening          | V1                |                 | W0                   | V1                | ✓ <sup>b</sup>  |                | V0               |                |                |
| Baseline           | V2                | ✓ <sup>b</sup>  | W2                   | V2                | ✓               | W0             | V1               | ✓ <sup>g</sup> |                |
| Induction          | W2                | V3              | ✓                    | W4                | V3              | ✓ <sup>b</sup> | W2               | V2             |                |
|                    | W4                | V4              | ✓ <sup>b</sup>       | W6                | V4              | ✓              | W4               | V3             | ✓ <sup>g</sup> |
|                    | W6                | V5              | ✓                    | W8                | V5              | ✓ <sup>b</sup> | W8               | V4             | ✓ <sup>h</sup> |
|                    | W8                | V6              | ✓ <sup>b</sup>       | W11–12            | V6 <sup>e</sup> | ✓              | W12              | V5             | ✓              |
|                    | W11–12            | V7 <sup>c</sup> | ✓                    | W12–13            | V7              | ✓              | ETV <sup>i</sup> |                | ✓              |
|                    | W12–13            | V8              | ✓                    | W16               | V8              | ✓              | V997 (UV)        |                | ✓              |
| W16                | V9                | ✓               | W20                  | V9                | ✓               | Follow-up      | LV +4            | V801           |                |
| W20                | V10               | ✓               | W24                  | V10               | ✓               | ±4             | V802             | ✓              |                |
| W24                | V11               | ✓               | W28                  | V11               |                 |                |                  |                |                |
| W28                | V12               | ✓               | W32                  | V12               | ✓               |                |                  |                |                |
| W32                | V13               | ✓               | W36                  | V13               |                 |                |                  |                |                |
| W36                | V14               |                 | W40                  | V14               | ✓               |                |                  |                |                |
| W40                | V15               | ✓               | W44–45               | V15               |                 |                |                  |                |                |
| W44                | V16               | ✓               | W48                  | V16               | ✓               |                |                  |                |                |
| W48                | V17               | ✓               | W52                  | V17               |                 |                |                  |                |                |
| W52                | V18               |                 | W56                  | V18               | ✓               |                |                  |                |                |
| W56                | V19               | ✓               | W60                  | V19               |                 |                |                  |                |                |
| W60                | V20               | ✓               | W64                  | V20               | ✓               |                |                  |                |                |
| W64                | V21               | ✓               | W68                  | V21               |                 |                |                  |                |                |
| W68                | V22               | ✓               | W72                  | V22               | ✓               |                |                  |                |                |
| W72                | V23               | ✓               | W76                  | V23               |                 |                |                  |                |                |
| W76                | V24               |                 | W80                  | V24               | ✓               |                |                  |                |                |
| W80                | V25               | ✓               | W84                  | V25               |                 |                |                  |                |                |
| W84                | V26               |                 | W88                  | V26               |                 |                |                  |                |                |
| W88                | V27               | ✓               | W92                  | V27               | ✓               |                |                  |                |                |
| W92                | V28               |                 | W96                  | V805              |                 |                |                  |                |                |
| W96                | V29               | ✓               | W100                 | V806              | ✓               |                |                  |                |                |
| W100               | V30               |                 | W104                 | V807              |                 |                |                  |                |                |
| W104               | V31               | ✓               | W108                 | V808 <sup>f</sup> | ✓               |                |                  |                |                |
| W108               | V801              |                 |                      |                   |                 |                |                  |                |                |
| W112               | V802              | ✓               |                      |                   |                 |                |                  |                |                |
| W116               | V803              |                 |                      |                   |                 |                |                  |                |                |
| W120               | V804 <sup>d</sup> | ✓               |                      |                   |                 |                |                  |                |                |

  

| LUCENT 2  |                               |                |
|-----------|-------------------------------|----------------|
| W         | V                             | S              |
| W0        | V1                            | ✓ <sup>j</sup> |
| W4        | V2                            | ✓              |
| W8        | V3                            |                |
| W12       | V4                            | ✓              |
| W16       | V5                            | ✓ <sup>k</sup> |
| W20       | V6                            | ✓ <sup>k</sup> |
| W24       | V7                            | ✓              |
| W28       | V8                            | ✓ <sup>k</sup> |
| W32       | V9                            | ✓ <sup>k</sup> |
| W36       | V10                           | ✓ <sup>k</sup> |
| 40 LV     | V11                           | ✓              |
| ETV       | N/A                           | ✓              |
| UV        | V997                          | ✓ <sup>k</sup> |
| Follow-up | LV or ETV +4                  | 801            |
|           | LV or ETV +12/16 <sup>l</sup> | 802            |
|           |                               | ✓              |

*C<sub>max</sub>* maximum concentration, *ETV* early termination visit, *IV* intravenous(ly), *LOR* loss of response, *LV* last visit, *N/A* not applicable, *PK* pharmacokinetic, *S* sampling for PK analysis, *SC* subcutaneously, *UV* unscheduled visit, *V* Visit, *W* Week

- <sup>a</sup>A single sample was drawn prior to study drug administration, if occurring on a dosing day
- <sup>b</sup>On the day of dosing, PK samples were drawn before each IV infusion (trough) and at the end of each IV infusion ( $C_{max}$ )
- <sup>c</sup>For patients who discontinued during the induction period, V7 (W12) served as the ETV
- <sup>d</sup>V804 (W120) served as the end-of-study visit or ETV if a patient prematurely discontinued from the study at any time during the maintenance or follow-up periods
- <sup>e</sup>For patients who were non-responders at the end of the induction phase, V6 (W12) served as the end-of-study visit
- <sup>f</sup>V808 (W108) served as the end-of-study visit or ETV if a patient prematurely discontinued from the study at any time during the maintenance phase or follow-up period
- <sup>g</sup>Pre-dose and post-dose sampling
- <sup>h</sup>Pre-dose sampling only
- <sup>i</sup>ETV could occur on any day without regard to visit interval
- <sup>j</sup>Results from W12 of the LUCENT 1 study were used for W0 of this study
- <sup>k</sup>Patients with confirmed secondary LOR should have samples taken prior to mirikizumab IV rescue dosing and 4 and 12 weeks after rescue initiation
- <sup>l</sup>Patients who discontinued study drug with last dose administered IV returned for a last visit + 16-week post-treatment follow-up visit without a 12-week follow-up. Patients who discontinued study drug with last dose administered SC returned for a last visit + 12-week post-treatment follow-up visit without a 16-week follow-up

**Online Resource 4: Table 2** List of covariates tested with the model generated using the AMAC and LUCENT 1+2 results for their impact on mirikizumab PK

|                                                                    | AMAC | LUCENT 1+2 |
|--------------------------------------------------------------------|------|------------|
| Age                                                                | ✓    | ✓          |
| Sex                                                                | ✓    | ✓          |
| Race                                                               |      | ✓          |
| Ethnic origin                                                      | ✓    |            |
| Baseline body weight                                               | ✓    | ✓          |
| Baseline body mass index                                           | ✓    | ✓          |
| Prior biologic therapy                                             |      | ✓          |
| Smoking                                                            |      | ✓          |
| Cockcroft-Gault creatinine clearance                               |      | ✓          |
| Baseline albumin                                                   |      | ✓          |
| Time-varying albumin                                               | ✓    | ✓          |
| Baseline C-reactive protein                                        | ✓    | ✓          |
| Time-varying C-reactive protein                                    |      | ✓          |
| Baseline bilirubin                                                 |      | ✓          |
| Baseline fecal calprotectin                                        | ✓    | ✓          |
| Duration of disease                                                |      | ✓          |
| Extent of disease                                                  | ✓    |            |
| SC injection site                                                  |      | ✓          |
| Baseline modified Mayo score                                       | ✓    | ✓          |
| Baseline stool frequency Mayo subscore                             |      | ✓          |
| Baseline rectal bleeding Mayo subscore                             | ✓    | ✓          |
| Baseline endoscopic findings Mayo subscore                         |      | ✓          |
| Baseline corticosteroid or immunomodulator use                     |      | ✓          |
| Baseline ASA use                                                   |      | ✓          |
| Baseline ASA and similar agents                                    |      | ✓          |
| Immunogenicity (ADA+/-, TE-ADA+/-, ADA titer, neutralizing ADA+/-) | ✓    | ✓          |

ADA antidrug antibody, ASA aminosalicylic acid, PK pharmacokinetics, SC subcutaneous, TE-ADA treatment-emergent antidrug antibody

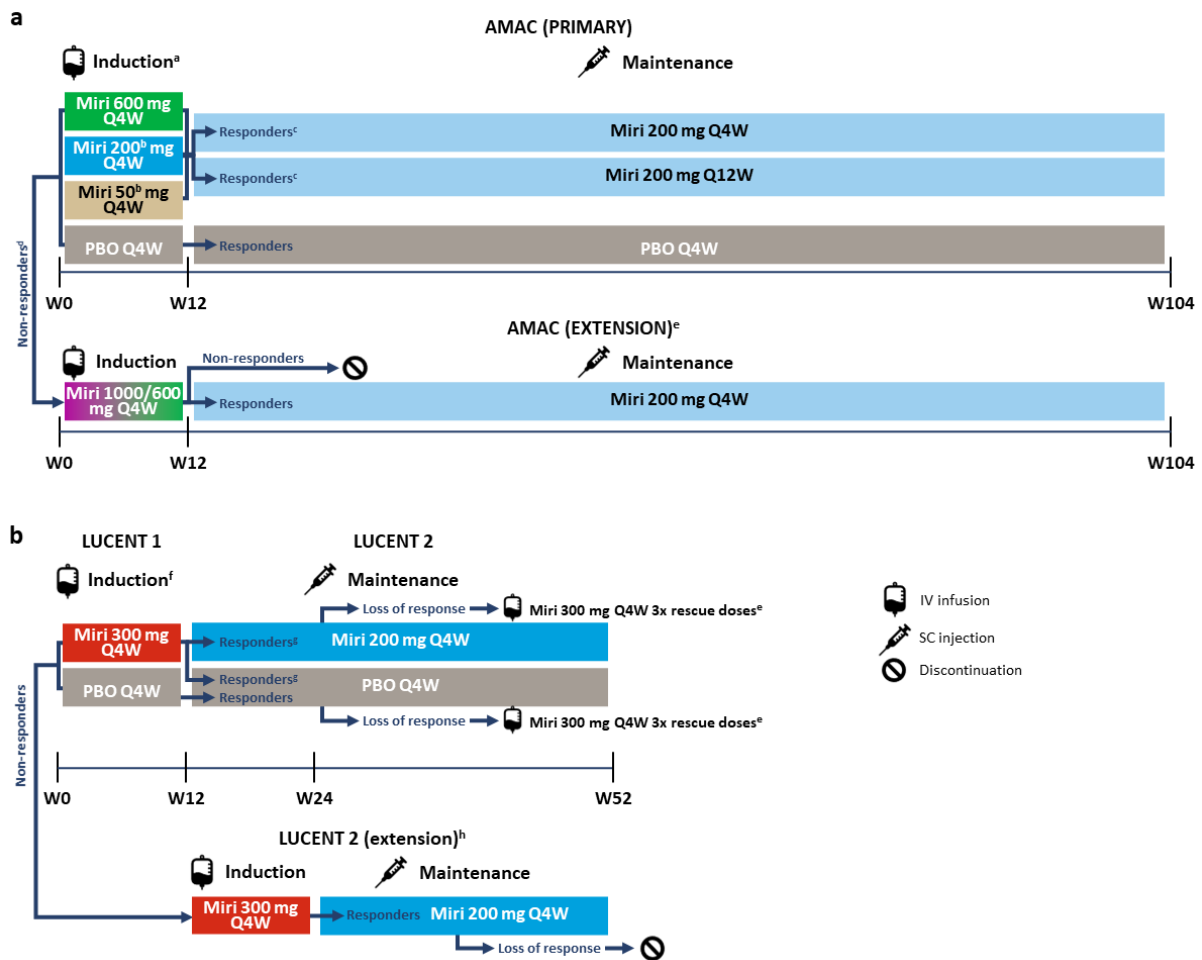

**Online Resource 1: Fig. 1 Design of AMAC, LUCENT 1, and LUCENT 2 trials**

Response was characterized by a decrease in MMS of  $\geq 2$  points and a  $\geq 30\%$  (AMAC) or  $\geq 30\%$  (LUCENT 1+2) decrease from baseline, and a decrease of  $\geq 1$  point in the RB subscore from baseline or an RB subscore of 0 or 1. Loss of response was defined as a  $\geq 2$ -point increase from maintenance baseline in the combined SF+RB scores and a combined SF+RB score of  $\geq 4$  on two consecutive visits, confirmed by an endoscopic subscore of 2 or 3

<sup>a</sup>1:1:1:1 randomization; <sup>b</sup>doses after the first one were adjusted based on exposure, resulting in an average group dose of Miri 250 mg and 100 mg for the 200-mg and 50-mg groups, respectively; <sup>c</sup>1:1 randomization; <sup>d</sup>non-responders to induction regimens had the option to discontinue from the study or enter the open-label extension period; <sup>e</sup>open-label; <sup>f</sup>3:1 randomization to Miri 300 mg or PBO IV Q4W; <sup>g</sup>2:1 randomization to Miri 200 mg or PBO SC Q4W; <sup>h</sup>open-label

IV intravenous, Miri mirikizumab, MMS modified Mayo score, PBO placebo, Q4W every 4 weeks, Q12W every 12 weeks, RB rectal bleeding, SC subcutaneous, SF stool frequency, W Week, LUCENT 1+2

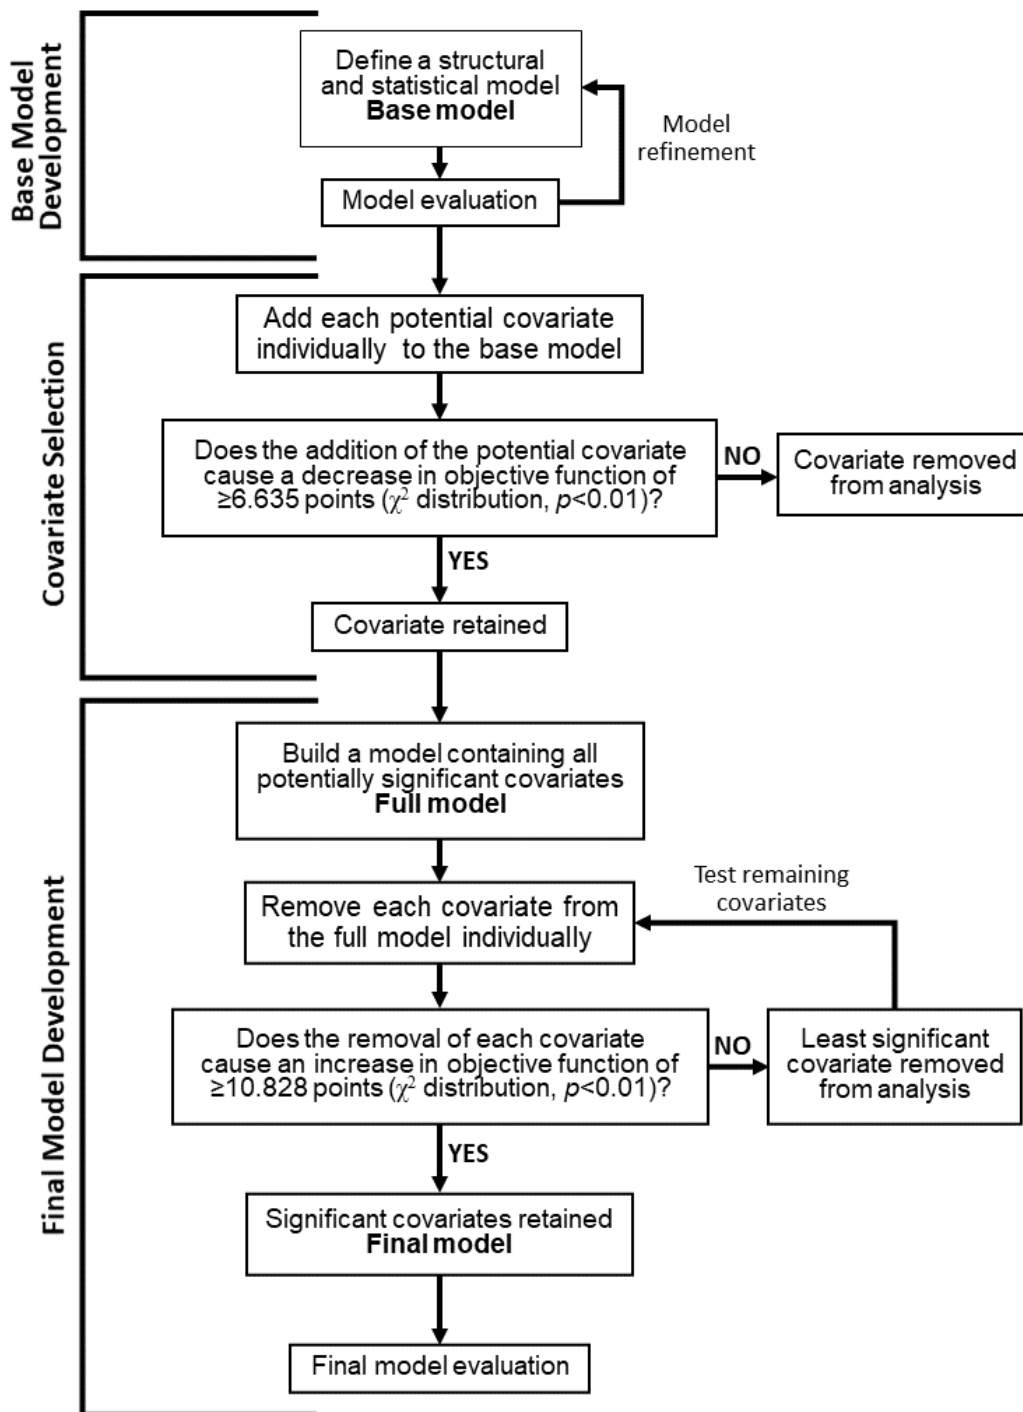

Online Resource 3: Fig. 2 General process for PK modeling. *PK* pharmacokinetic
